# Supplementary material for: Endothelial activation of caspase-9 promotes neurovascular injury in retinal vein occlusion
Source: PubMed Central journal article supplement (PMC7311551; doi:10.1038/s41467-020-16902-5), 2020-06-23
Supplement: 41467_2020_16902_MOESM1_ESM.pdf [file 41467_2020_16902_MOESM1_ESM.pdf]

# **Endothelial activation of caspase-9 promotes neurovascular injury in retinal vein occlusion**

M.I. Avrutsky et al.

Supplementary Figures and Information

**A**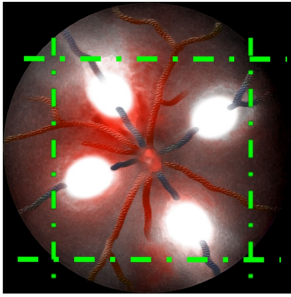**B**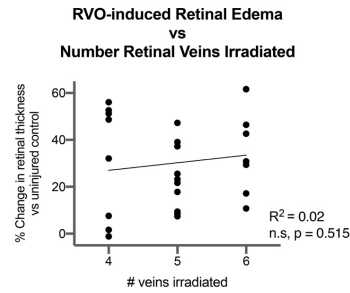**C**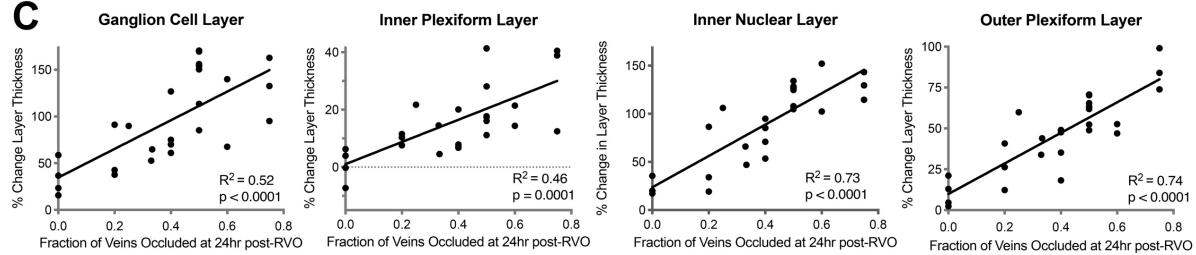

**Supplement Figure 1. Related to Figure 1. Correlation of retinal vein occlusion and swelling of retinal layers**

- Schematic illustration of where OCT measures are acquired relative to positioning of laser burns. Average OCT retinal thickness is derived from the average of 4 OCT images acquired distal from laser burn areas, as indicated by green dashed lines.
- RVO was induced by irradiating all major retinal veins (4-6). Higher laser burden in eyes with 6 irradiated veins does not correlate with greater edema (linear regression,  $n=25$ ).
- Retinal swelling in individual retinal layers is correlated to fraction of veins occluded at 24hr post-RVO (linear regression,  $n=25$ ).  
Source data are provided as a Source Data file.

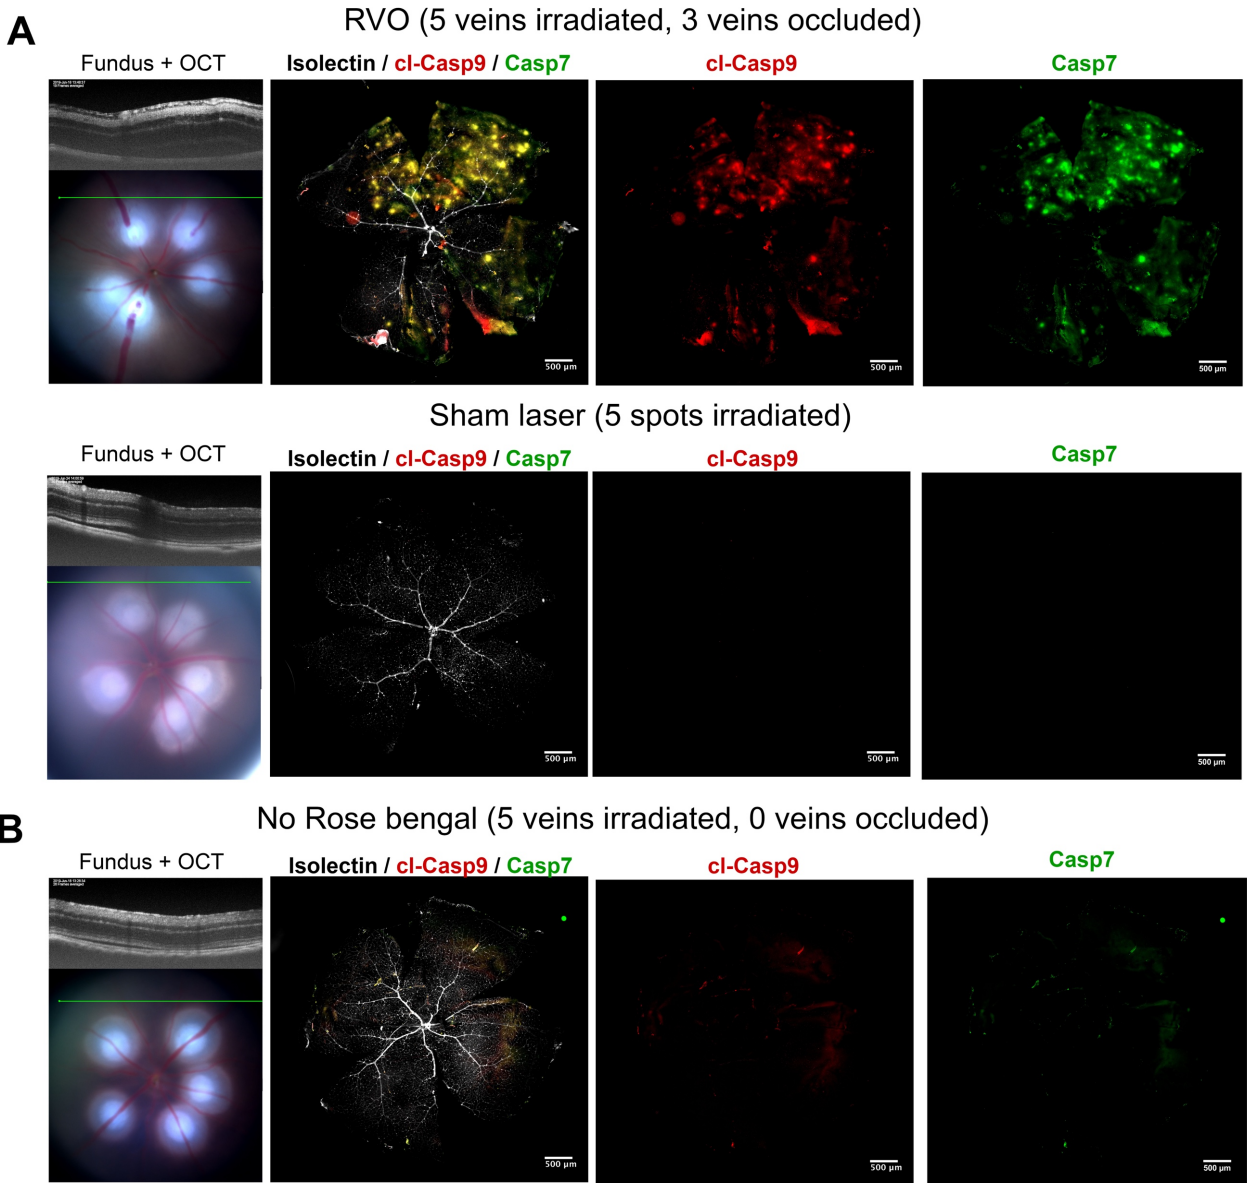

**Supplement Figure 2. Related to Figure 2. Laser irradiation does not induce retinal edema or caspase-9 signaling**

- A. *In vivo* imaging and immunostaining of retinas 4 hours post-RVO or sham laser (white=isolectin, red=cl-Casp9, green=Casp7, n=4, scale bar = 500μm).
- B. *In vivo* imaging and immunostaining of retinas 4 hours post application of laser burns to veins without occlusion. Veins were irradiated using standard laser settings, but without administration of Rose Bengal, resulting in no occlusions. (white=isolectin, red=cl-Casp9, green=Casp7, n=4, scale bar = 500μm). cl-casp9, cl-caspase-9; casp7, caspase-7. Source data are provided as a Source Data file.

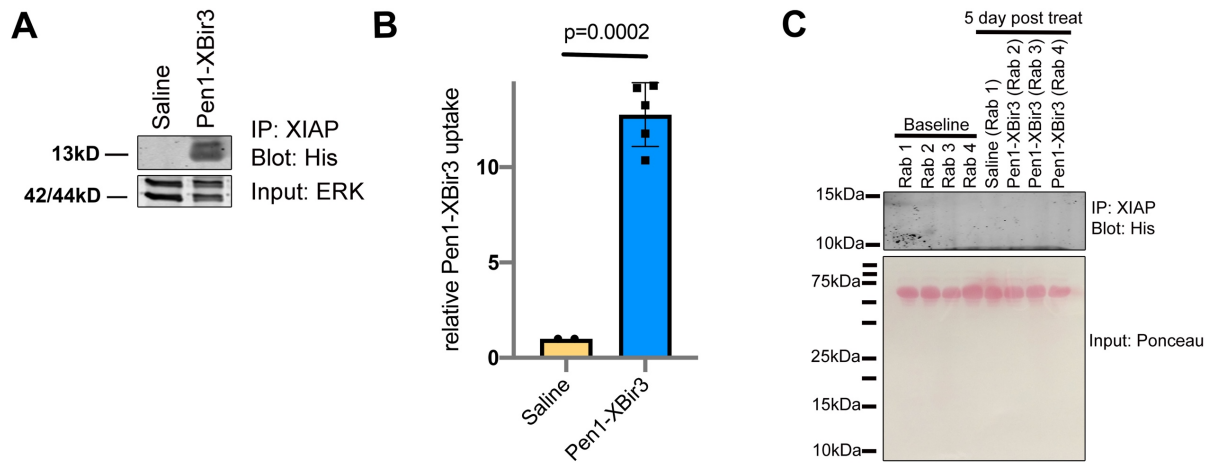

**Supplement Figure 3. Related to Figure 3. Eye-drop delivery of Pen1-XBir3 to rabbit eyes**

- Western blot showing detection of XBir3 in retinal lysates following administration of Pen1-XBir3 eye-drops in rabbits for 5 consecutive days.
- Quantification; two-tailed unpaired t-test, n=2 retinas (saline) n=5 retinas (Pen1-XBir3); mean  $\pm$ SEM
- Western blot showing no detection of XBir3 in rabbit plasma after administration of Pen1-XBir3 eye-drops for 5 consecutive days. n=1 rabbit (saline), n=3 rabbits (Pen1-XBir3).  
Source data are provided as a Source Data file.

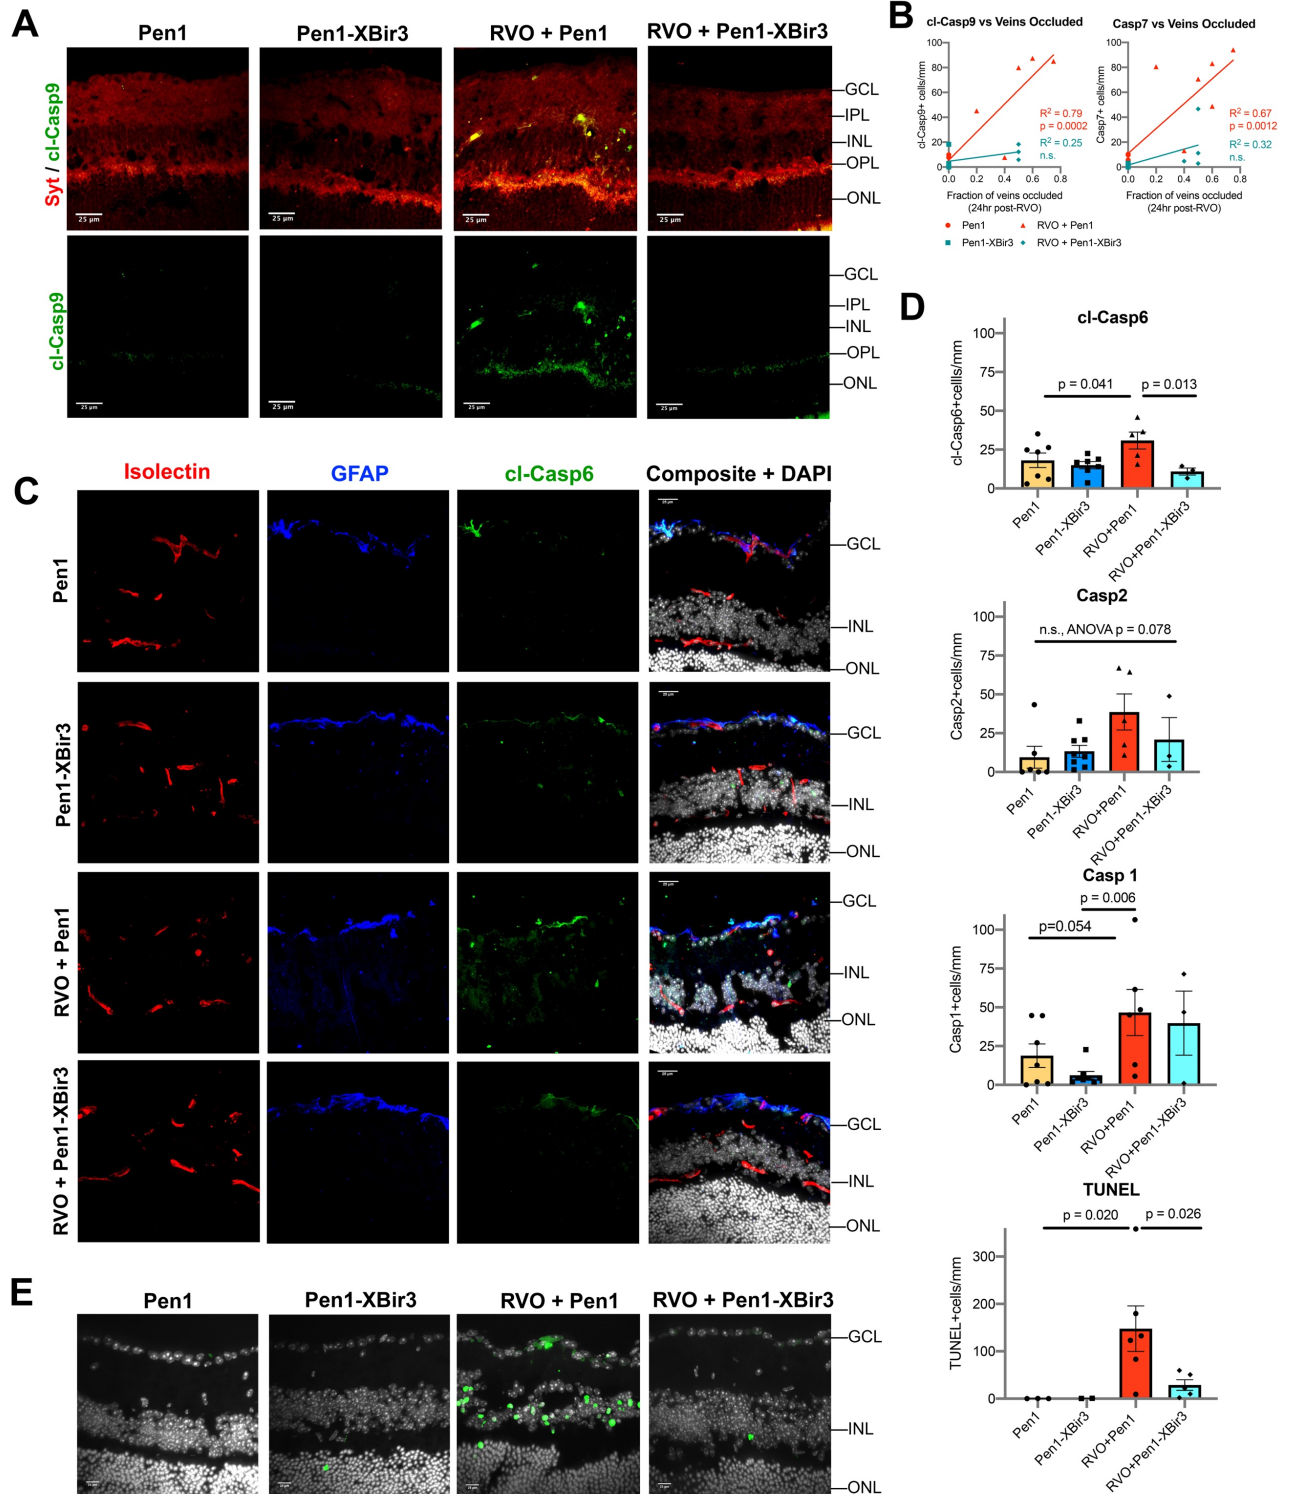

Supplement Figure 4. Related to Figure 4. Pen1-XBir3 inhibits caspase-9 signaling post-RVO

**Supplement Figure 4. Related to Figure 4. Pen1-XBir3 inhibits caspase-9 signaling post-RVO**

- A. Synaptotagmin (red) marks neuronal processes in the IPL and OPL. Low levels of cl-Casp9 (green) colocalize with synaptotagmin in uninjured eyes. Expression of cl-Casp9 in neuronal processes increases 24hr post-RVO, and is blocked by Pen1-XBir3. (scale bar = 25 $\mu$ m, n=3).
- B. Induction of cl-Casp9 and cl-Casp7 is correlated to fraction of veins occluded in Pen1 and not in Pen1-XBir3-treated eyes (Linear regression, cl-Casp9; Pen1 (n=6), RVO + Pen1 (n=5), Pen1-XBir3 (n=5), RVO + Pen1-XBir3 (n=3), clCasp7; Pen1 (n=6), RVO + Pen1 (n=6), Pen1-XBir3 (n=6), RVO + Pen1-XBir3 (n=4))
- C. Retinal sections from control eyes and 24hr post-RVO, immunostained for isolectin (red), GFAP (blue), cl-Casp6 (green), and DAPI (white) (scale bar = 25 $\mu$ m). Pen1 (n=7), RVO + Pen1 (n=5), Pen1-XBir3 (n=7), RVO + Pen1-XBir3 (n=3)
- D. Quantification of cl-Casp6, Casp 2 and Casp1 signal in control eyes and 24hr post-RVO; n=3-8, ANOVA with Fisher's LSD, mean  $\pm$ SEM. Pen1 (n=6), RVO + Pen1 (n=5), Pen1-XBir3 (n=8), RVO + Pen1-XBir3 (n=3)
- E. Retinal sections from control eyes and 24hr post-RVO, stained for TUNEL (green) and DAPI (white). (scale bar = 25 $\mu$ m). Quantification on right, one-way ANOVA with Fisher's LSD, mean  $\pm$ SEM. Pen1 (n=3), RVO + Pen1 (n=6), Pen1-XBir3 (n=2), RVO + Pen1-XBir3 (n=5)  
cl-casp9, cl-caspase-9; casp7, caspase-7; cl-casp6, cl-caspase-6; casp2, caspase-2, casp1, caspase1. Source data are provided as a Source Data file.

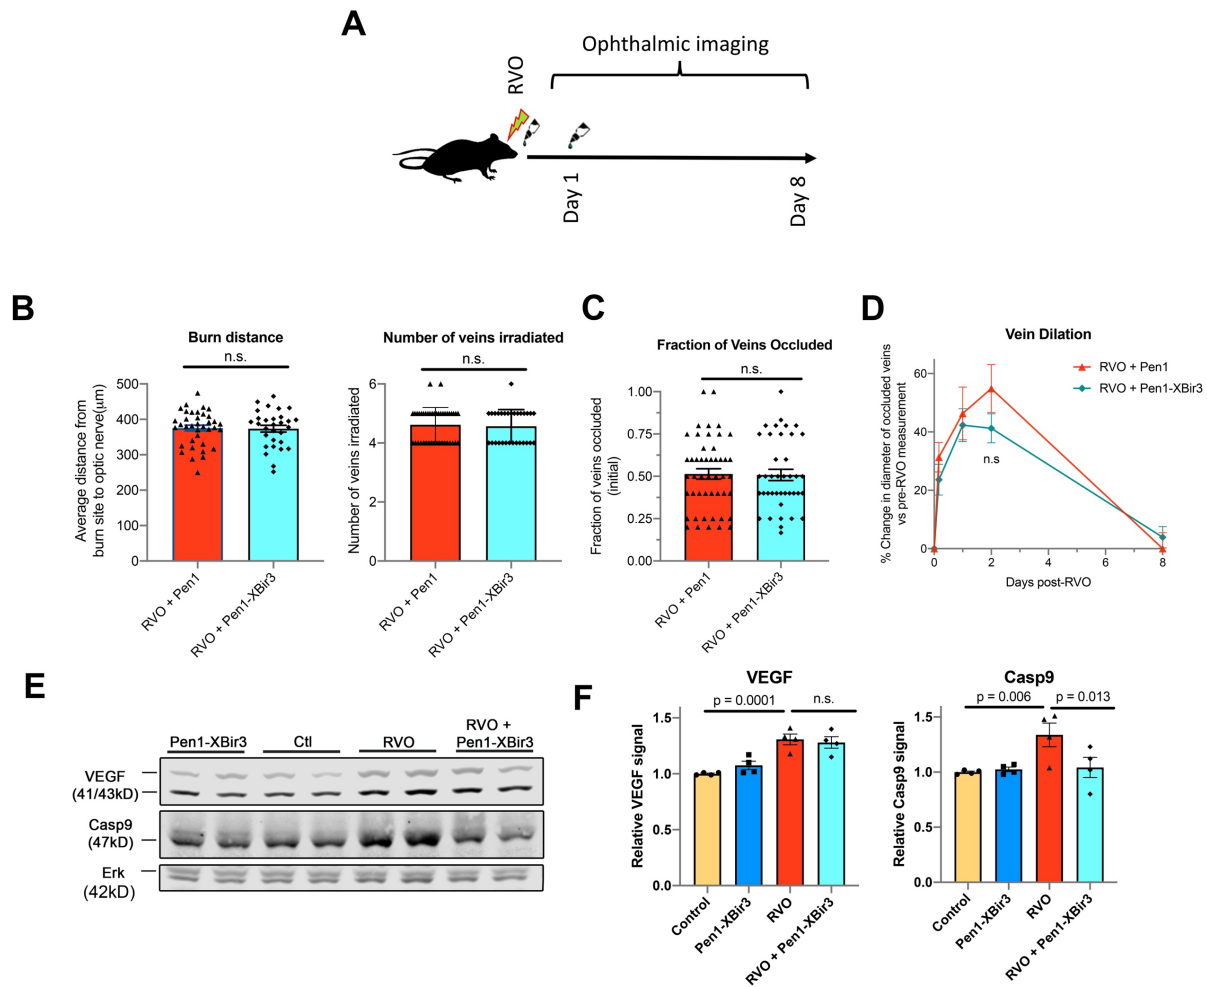

**Supplement Figure 5. Related to Figure 5. Induction of RVO in Pen1 and Pen1-XBir3 treated eyes**

- Schematic diagram of Pen1-XBir3 or Pen1 eye-drop administration in RVO studies; animals received first dose of eye-drops immediately after induction of RVO, and a second dose at 24hr post-RVO. Animals were followed through 8 days by *in vivo* ophthalmic imaging.
- Measurement of average laser-burn distance to optic nerve and number of veins irradiated in Pen1 (n=37) and Pen1-XBir3 (n=30) treated eyes; two-tailed Welch's t-test; mean  $\pm$ SEM.
- Fraction of veins initially occluded after induction of RVO in Pen1 (n=37) and Pen1-XBir3 (n=30) treated eyes; two-tailed Welch's t-test; mean  $\pm$ SEM.
- Measurement of changes in vein diameter in occluded veins in Pen1 (n=16, 11, 14, 13) and Pen1-XBir3 (n=11, 12, 16, 15) treated eyes at 4hr, 24hr, 48hr, and 8 days post-RVO; two-tailed Welch's t-test; mean  $\pm$ SEM.
- Western blot of retinal lysates at 24hr post-RVO. Pen1-XBir3 eye-drops prevent induction of caspase-9 but not induction of VEGF.
- Quantification of E; one way ANOVA with Fisher's LSD, n=4; mean  $\pm$ SEM. Casp9, caspase-9. Source data are provided as a Source Data file.

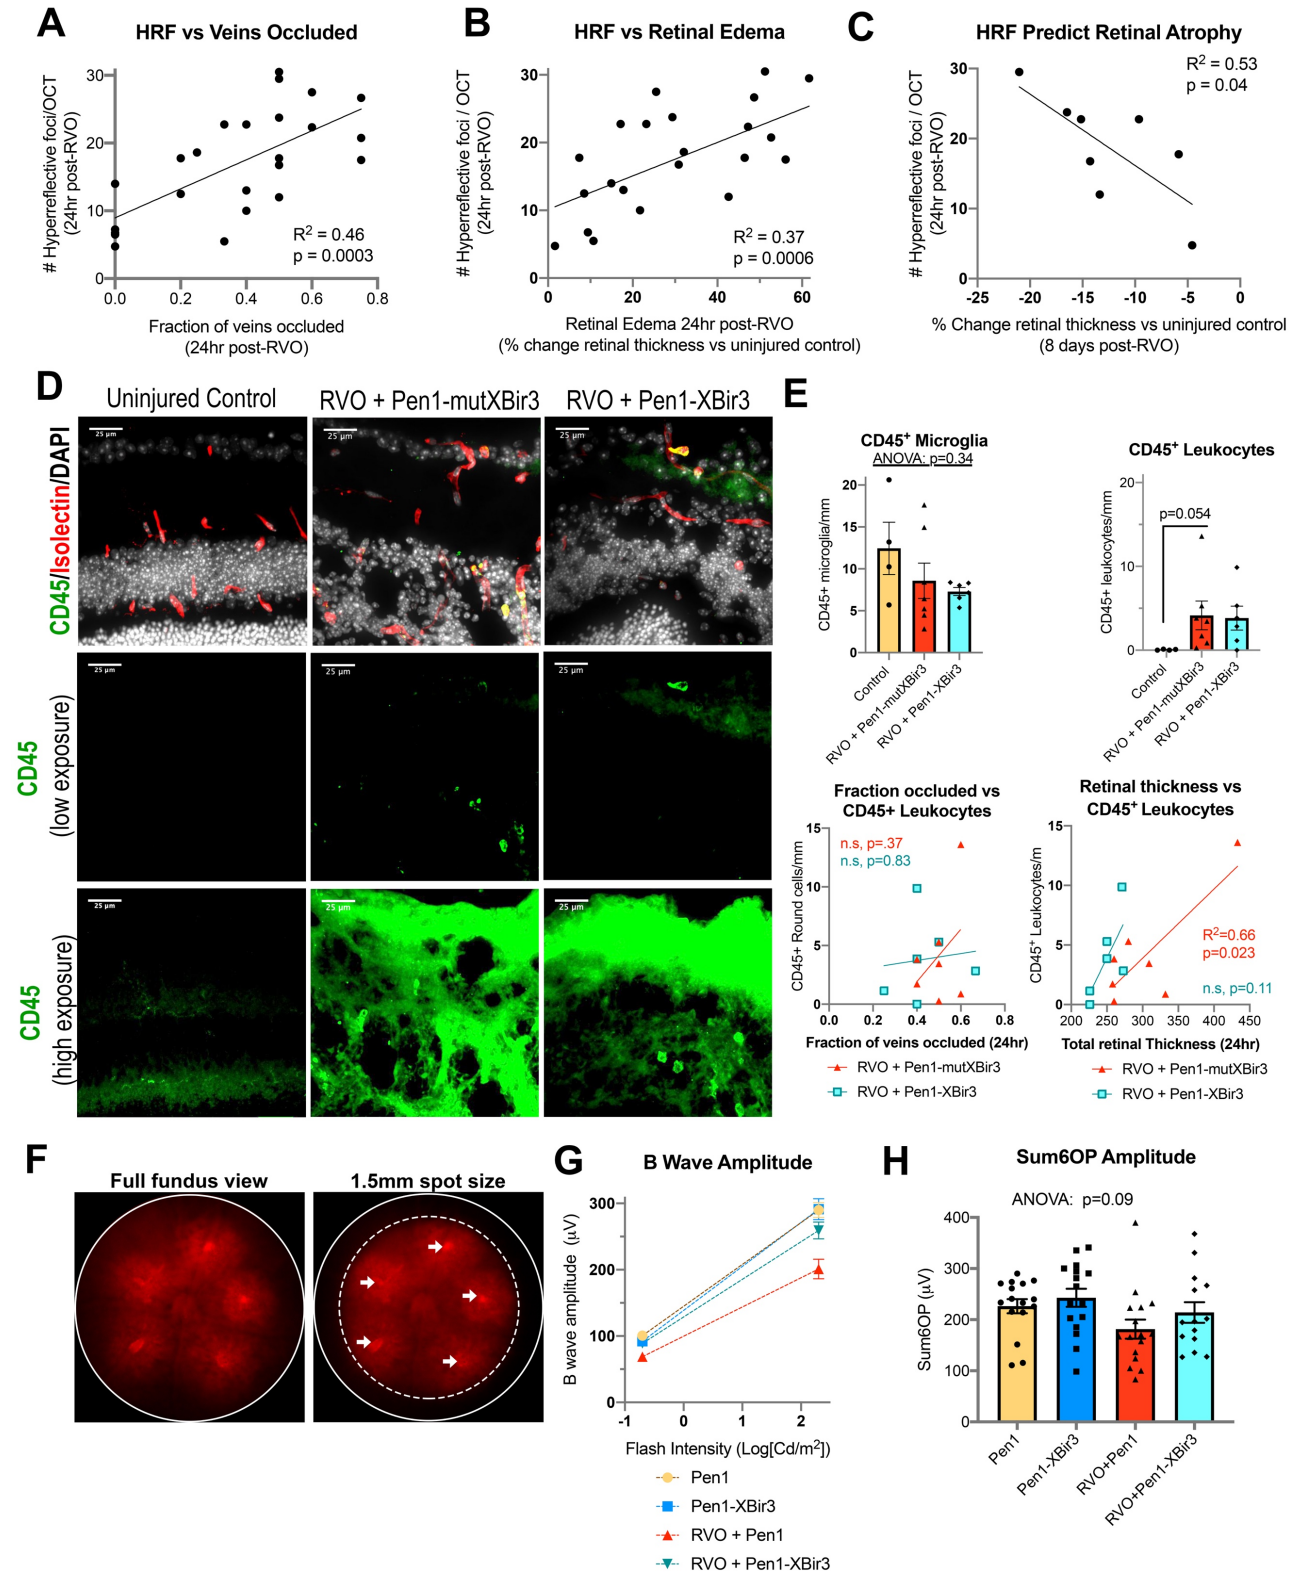

Supplement Figure 6. Related to Figure 6. HRF and ERG measurements following RVO



**Supplement Figure 6. Related to Figure 6. HRF and ERG measurements following RVO**

- A.** Number of retinal HRF is correlated to fraction of veins occluded at 24hr post-RVO (linear regression, n=25)
- B.** Number of retinal HRF is correlated to retinal thickness 24hr post-RVO (linear regression, n=25)
- C.** Number of retinal HRF at 24hr post-RVO is correlated to retinal thickness at 8 days post-RVO (linear regression, n=8)
- D.** Retinal sections from control eyes (n=4) and 24hr post-RVO treated with Pen-XBir3 (n=6) and Pen1-mutXBir3 (n=7) stained with CD45 (green), Isolectin (red) and DAPI (white). CD45 depicted at two brightness intensities. Scale bar = 25 $\mu$ m
- E.** Quantification of images in D, showing number of CD45+ microglia and CD45+ leukocytes (one-way Welch's ANOVA with unpaired Welch's t-test, mean  $\pm$ SEM), and correlation between CD45+ leukocytes and fraction of veins occluded and retinal edema 24hr post-RVO (linear regression).
- F.** Illustration of spot size parameters for focal ERG measurements. Full retinal fundus view indicated via solid circle; retinal illumination by 1.5mm spot size centered around optic nerve indicated by dashed circle. Laser burns indicated with arrows.
- G.** Quantification of b wave amplitude in uninjured control (n=16) and 7 days post-RVO (n=15) in Pen1 and Pen1-XBir3 treated eyes; mean  $\pm$ SEM.
- H.** Quantification of sum oscillatory potentials (OP) amplitude in uninjured control eyes (n=16) and 7 days post-RVO in Pen1 (n=16) and Pen1-XBir3 (n=14) treated eyes; One-way ANOVA; mean  $\pm$ SEM. Source data are provided as a Source Data file.

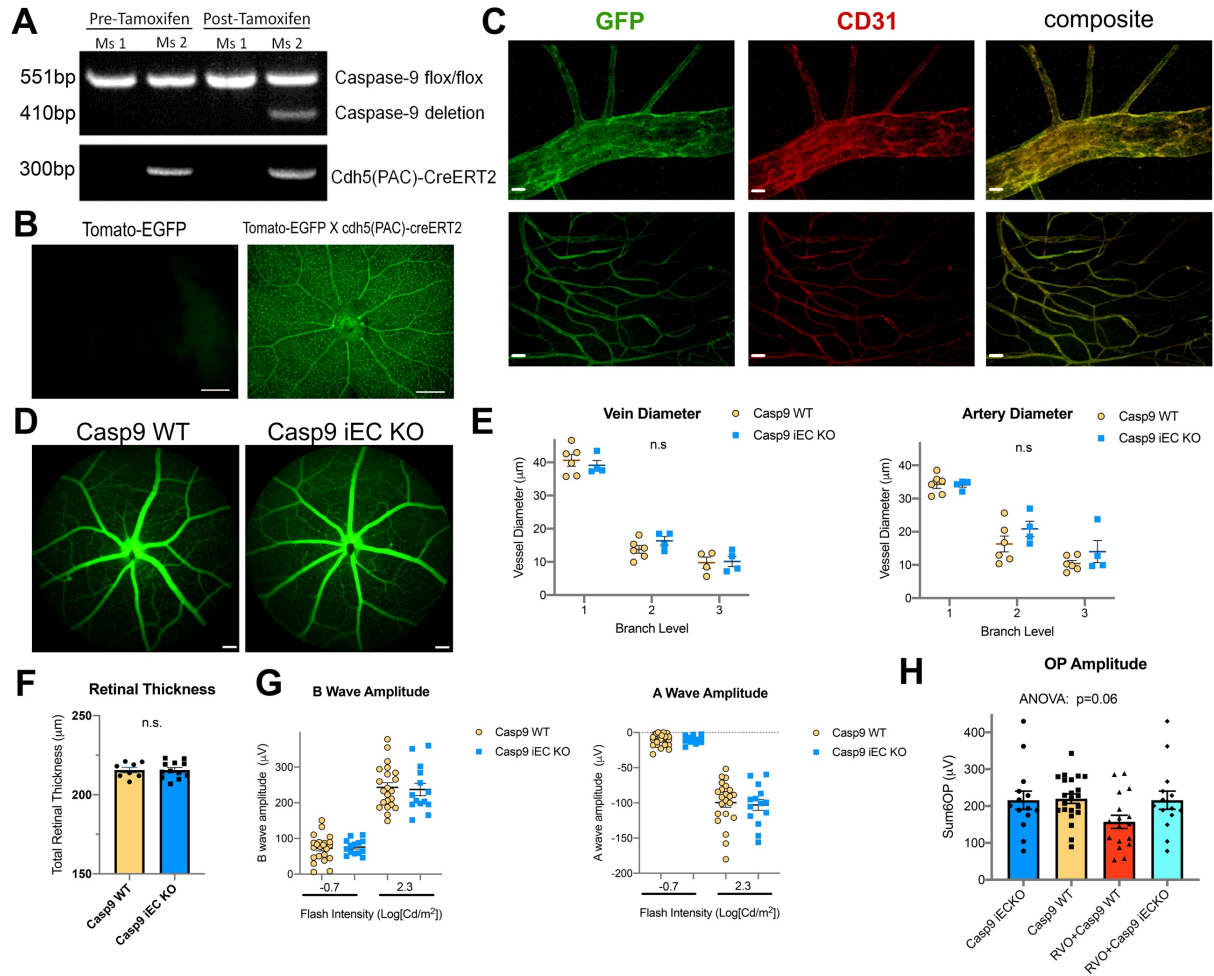

**Supplement Figure 7. Related to Figure 7. Characterization of inducible endothelial caspase-9 knockout (Casp9 iEC KO) mice**

- Genotyping PCR of Casp9 WT mouse (Ms1) and Casp9 iEC KO mouse (Ms2) before and after tamoxifen treatment shows induction of caspase-9 deletion in Ms2;  $n=2$
- GFP fluorescence in retinal flatmount of Tomato-EGFP reporter mouse and Tomato-EGFP Cdh5(PAC)-CreERT2 mouse following tamoxifen induction of recombination;  $n=2$ ; scale bar= $500\mu\text{m}$
- Flatmount of EGFP X Cdh5(PAC)-CreERT2 retina following tamoxifen induction, immunostained with GFP and endothelial marker CD31 shows recombination in large vessels (top) and microvasculature (bottom) (scale bar= $29\mu\text{m}$ ).
- Fluorescein angiography of female Casp9 WT and Casp9 iEC KO mice show no differences in retinal vascular morphology or retinal vascular permeability. scale bar= $100\mu\text{m}$
- Quantification of vein and artery diameters from fluorescein angiography images of Casp9 WT ( $n=6$ ) and Casp9 iEC KO ( $n=4$ ) mice; two-tailed Welch's t-test; mean  $\pm$  SEM.
- Quantification of baseline OCT retinal thickness in Casp9 WT ( $n=8$ ) and Casp9 iEC KO ( $n=12$ ) eyes; Welch's t-test; mean  $\pm$  SEM
- Quantification of scotopic ERG b-wave amplitude and a-wave amplitude, in Casp9 WT ( $n=22$ ) and Casp9 iEC KO ( $n=11$ ) eyes under dim ( $-0.7\text{log}(\text{Cd}/\text{m}^2)$ ) and bright ( $2.3\text{log}(\text{Cd}/\text{m}^2)$ ) flash stimulus shows no difference in basal ERG response; mean  $\pm$  SEM
- Quantification of sum oscillatory potential (OP) amplitude 7 days post-RVO in Casp9 WT (uninjured  $n=22$ , RVO  $n=17$ ) and Casp9 iEC KO eyes (uninjured  $n=14$ , RVO  $n=14$ ) (flash intensity =  $2.3\text{log}(\text{Cd}/\text{m}^2)$ ); One-way ANOVA; mean  $\pm$  SEM.

Source data are provided as a Source Data file.

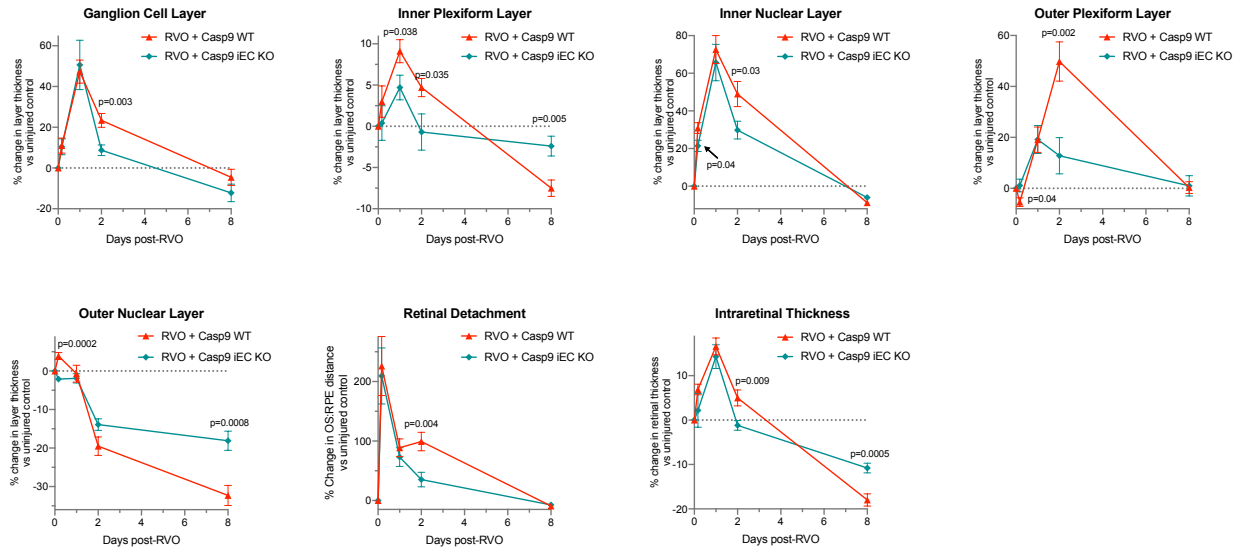

**Supplement Figure 8. Related to Figure 8. Layer-specific changes in OCT retinal thickness**

Quantification of changes in average OCT retinal thickness in specific retinal layers relative to baseline thickness of uninjured controls. RVO + Casp9 WT (n=12, 22, 12, 10), RVO + Casp9 iEC KO (n=7, 19, 11, 13); two-tailed Welch's t-test; as mean ±SEM. Source data are provided as a Source Data file.

**Table 1 (Key Resources)**

| Antibodies           |                   |                  |                                                        |                       |
|----------------------|-------------------|------------------|--------------------------------------------------------|-----------------------|
| Target               | Supplier          | Catalog Number   | Application (validation)                               | Dilution              |
| Caspase-9            | Abcam             | Ab28131          | WB (validated by supplier for WB)                      | 1:1000                |
| cl-Caspase-9         | Cell Signaling    | 9505-S           | IHC (validated by supplier for WB, IP in human tissue) | 1:800                 |
| cl-Caspase-9         | Abcam             | Ab2325           | IHC, WB (validated by supplier for WB, ICC)            | IHC 1:50<br>WB: 1:500 |
| Caspase-7 488        | Novus Biologicals | NB-56529AF488    | IHC (validated by supplier for IHC)                    | 1:150                 |
| cl-Caspase-3 647     | Cell Signaling    | #9602            | IHC (validated by supplier for IF-IC)                  | 1:50                  |
| Caspase-8            | Cell Signaling    | #4790S           | IHC (validated by supplier for WB)                     | 1:100                 |
| cl-Caspase-6         | Cell Signaling    | #9761            | IHC (validated by supplier for WB)                     | 1:100                 |
| Caspase-2            | Enzo              | ALX 804-355-C100 | IHC (validated by supplier for ICC)                    | 1:100                 |
| Caspase-1 488        | Novus             | NB100-S56565     | IHC (validated by supplier for ICC/IF)                 | 1:100                 |
| CD45 (D3F8Q)         | Cell Signaling    | 70257S           | IHC (validated by supplier for IHC)                    | 1:100                 |
| CD31                 | BD Pharmigen      | 553370           | IHC (validated by supplier for IHC)                    | 1:50                  |
| GFP                  | Life Tech         | A11122           | IHC (validated by supplier for IHC)                    | 1:1000                |
| GFAP                 | Sigma             | G-3893           | IHC (validated by supplier for IHC)                    | 1:2000                |
| Isolectin (594, 649) | Vector            | DL-1207          | IHC (validated by supplier for IF)                     | 1:200                 |
| XIAP                 | Cell Signaling    | 2042             | IP (validated by supplier by WB)                       | 1:200                 |
| ERK                  | Santa Cruz        | SC-93            | WB (validated by supplier for WB)                      | 1:5000                |
| His                  | GenScript         | A00186           | WB (validated by supplier for WB)                      | 1:5000                |
| VEGF                 | Abcam             | Ab46154          | WB (validated by supplier for WB)                      | 1:1000                |
| Synaptotagmin        | Aves              | STG              | IHC (validated by supplier for IHC)                    | 1:2000                |

| Chemicals, Peptides, and Recombinant Proteins                                                                                                             |                   |
|-----------------------------------------------------------------------------------------------------------------------------------------------------------|-------------------|
| Penetratin -1 (Pen1):<br>C(NPys)-RQIKIWFQNRRMKWKK                                                                                                         | PolyPeptide Group |
| XBir3:<br><u>MGSSHHHHHSSGLVPRGSHMSTNLPRNPSMADYEARIFTFGTWIYSVNKEQLAR</u><br><u>AGFYALGEGDKVKCFHCGGLTDWKPSEDPWEQHAKWYPGCKYLLEQKGQEYI</u><br><u>NNIHLTHS</u> | Salvesen lab      |

|                                                                                                                                                                    |                       |                             |
|--------------------------------------------------------------------------------------------------------------------------------------------------------------------|-----------------------|-----------------------------|
| XBir3[Q319R, W323V] (inactive mutant):<br>MGSSHHHHHSSGLVPRGSHMSTNLPRNPSMADYERIFTFGTWIYSVNKEQLAR<br>AGFYALGEGDKVKCFHCGGLTDWKPSDPWERHAKVYPGCKYLLEOKGQEYIN<br>NIHLTHS |                       | Salvesen lab                |
| Tamoxifen                                                                                                                                                          | Sigma                 | 330000                      |
| Rose bengal                                                                                                                                                        | Sigma                 | 1002604051                  |
| Ketamine                                                                                                                                                           | Henry Schein          |                             |
| Xylazine                                                                                                                                                           | Henry Schein          | 139-236                     |
| Tropicamide                                                                                                                                                        | Akorn                 | NDC 17487-102-12            |
| Phenylephrine chloride                                                                                                                                             | Akorn                 | NDC 17478-201-15            |
| Proparacaine                                                                                                                                                       | Akorn                 | NDC 17478-263-12            |
| Fluorescein                                                                                                                                                        | Akorn                 | NDC 17478-253-10            |
| Carprofen                                                                                                                                                          | Henry Schein          | NDC 11695-6934-1            |
| DeadEnd Fluorometric TUNEL System                                                                                                                                  | Promega               | G3250                       |
| Experimental Models: Organisms/Strains                                                                                                                             |                       |                             |
| C57/B16J                                                                                                                                                           | Jackson Labs          | Stock # 00664               |
| Caspase-9 flox/flox                                                                                                                                                | Genentech             | (Simon et al., 2012)        |
| Endothelial cell-CreERT2 (Cdh5(PAC)-<br>CreERT2)                                                                                                                   | R. Adams              | (Pitulescu et al.,<br>2010) |
| Cre Reporter mT/mG                                                                                                                                                 | Jackson Labs          | Stock # 007676              |
| Adult female New Zealand White Rabbits                                                                                                                             | EyeCro                |                             |
| Oligonucleotides                                                                                                                                                   |                       |                             |
| Primers for caspase-9 genotyping:<br>1: GCAACTTGGAACCCACATG<br>2: GGACAGATGGATGCTCCGT<br>3: GGACCATTACCTCTACCTGCCT                                                 |                       | Life Technologies           |
| Primers for Cdh5(PAC)-CreERT2 genotyping:<br>1: GATATCTCACGTA CTGACGG<br>2: TGACCAGAGTCATCCTTAGC                                                                   |                       | Life Technologies           |
| Software and Algorithms                                                                                                                                            |                       |                             |
| Insight 2D Version 2                                                                                                                                               | Phoenix Research Labs |                             |
| Labscribe3 ERG 3.0168                                                                                                                                              | Phoenix Research Labs |                             |
| Fundus retinal imaging: StreamPix version<br>6                                                                                                                     | Phoenix Research Labs |                             |

|                                                      |                       |  |
|------------------------------------------------------|-----------------------|--|
| MicronOCT version 7.2.4.2                            | Phoenix Research Labs |  |
| Confocal imaging: ZEN 2.3 (blue edition)             | ZEISS                 |  |
| Confocal imaging: VisiView 4.0                       | Visitron Systems      |  |
| Western Imaging: Licor Image Studio 5.x              | Li-Cor                |  |
| Western blot analysis: Licor Image Studio Lite 5.2.5 | Li-Cor                |  |
| FIJI 1.0                                             |                       |  |
| Prism 8.3.1                                          | GraphPad              |  |
| Excel Version 16.27                                  | Microsoft             |  |
| Other                                                |                       |  |
| Micron IV retinal imaging system                     | Phoenix Research Labs |  |
